# Supplementary material
Source: PubMed Central journal article supplement (PMC4253849)

A

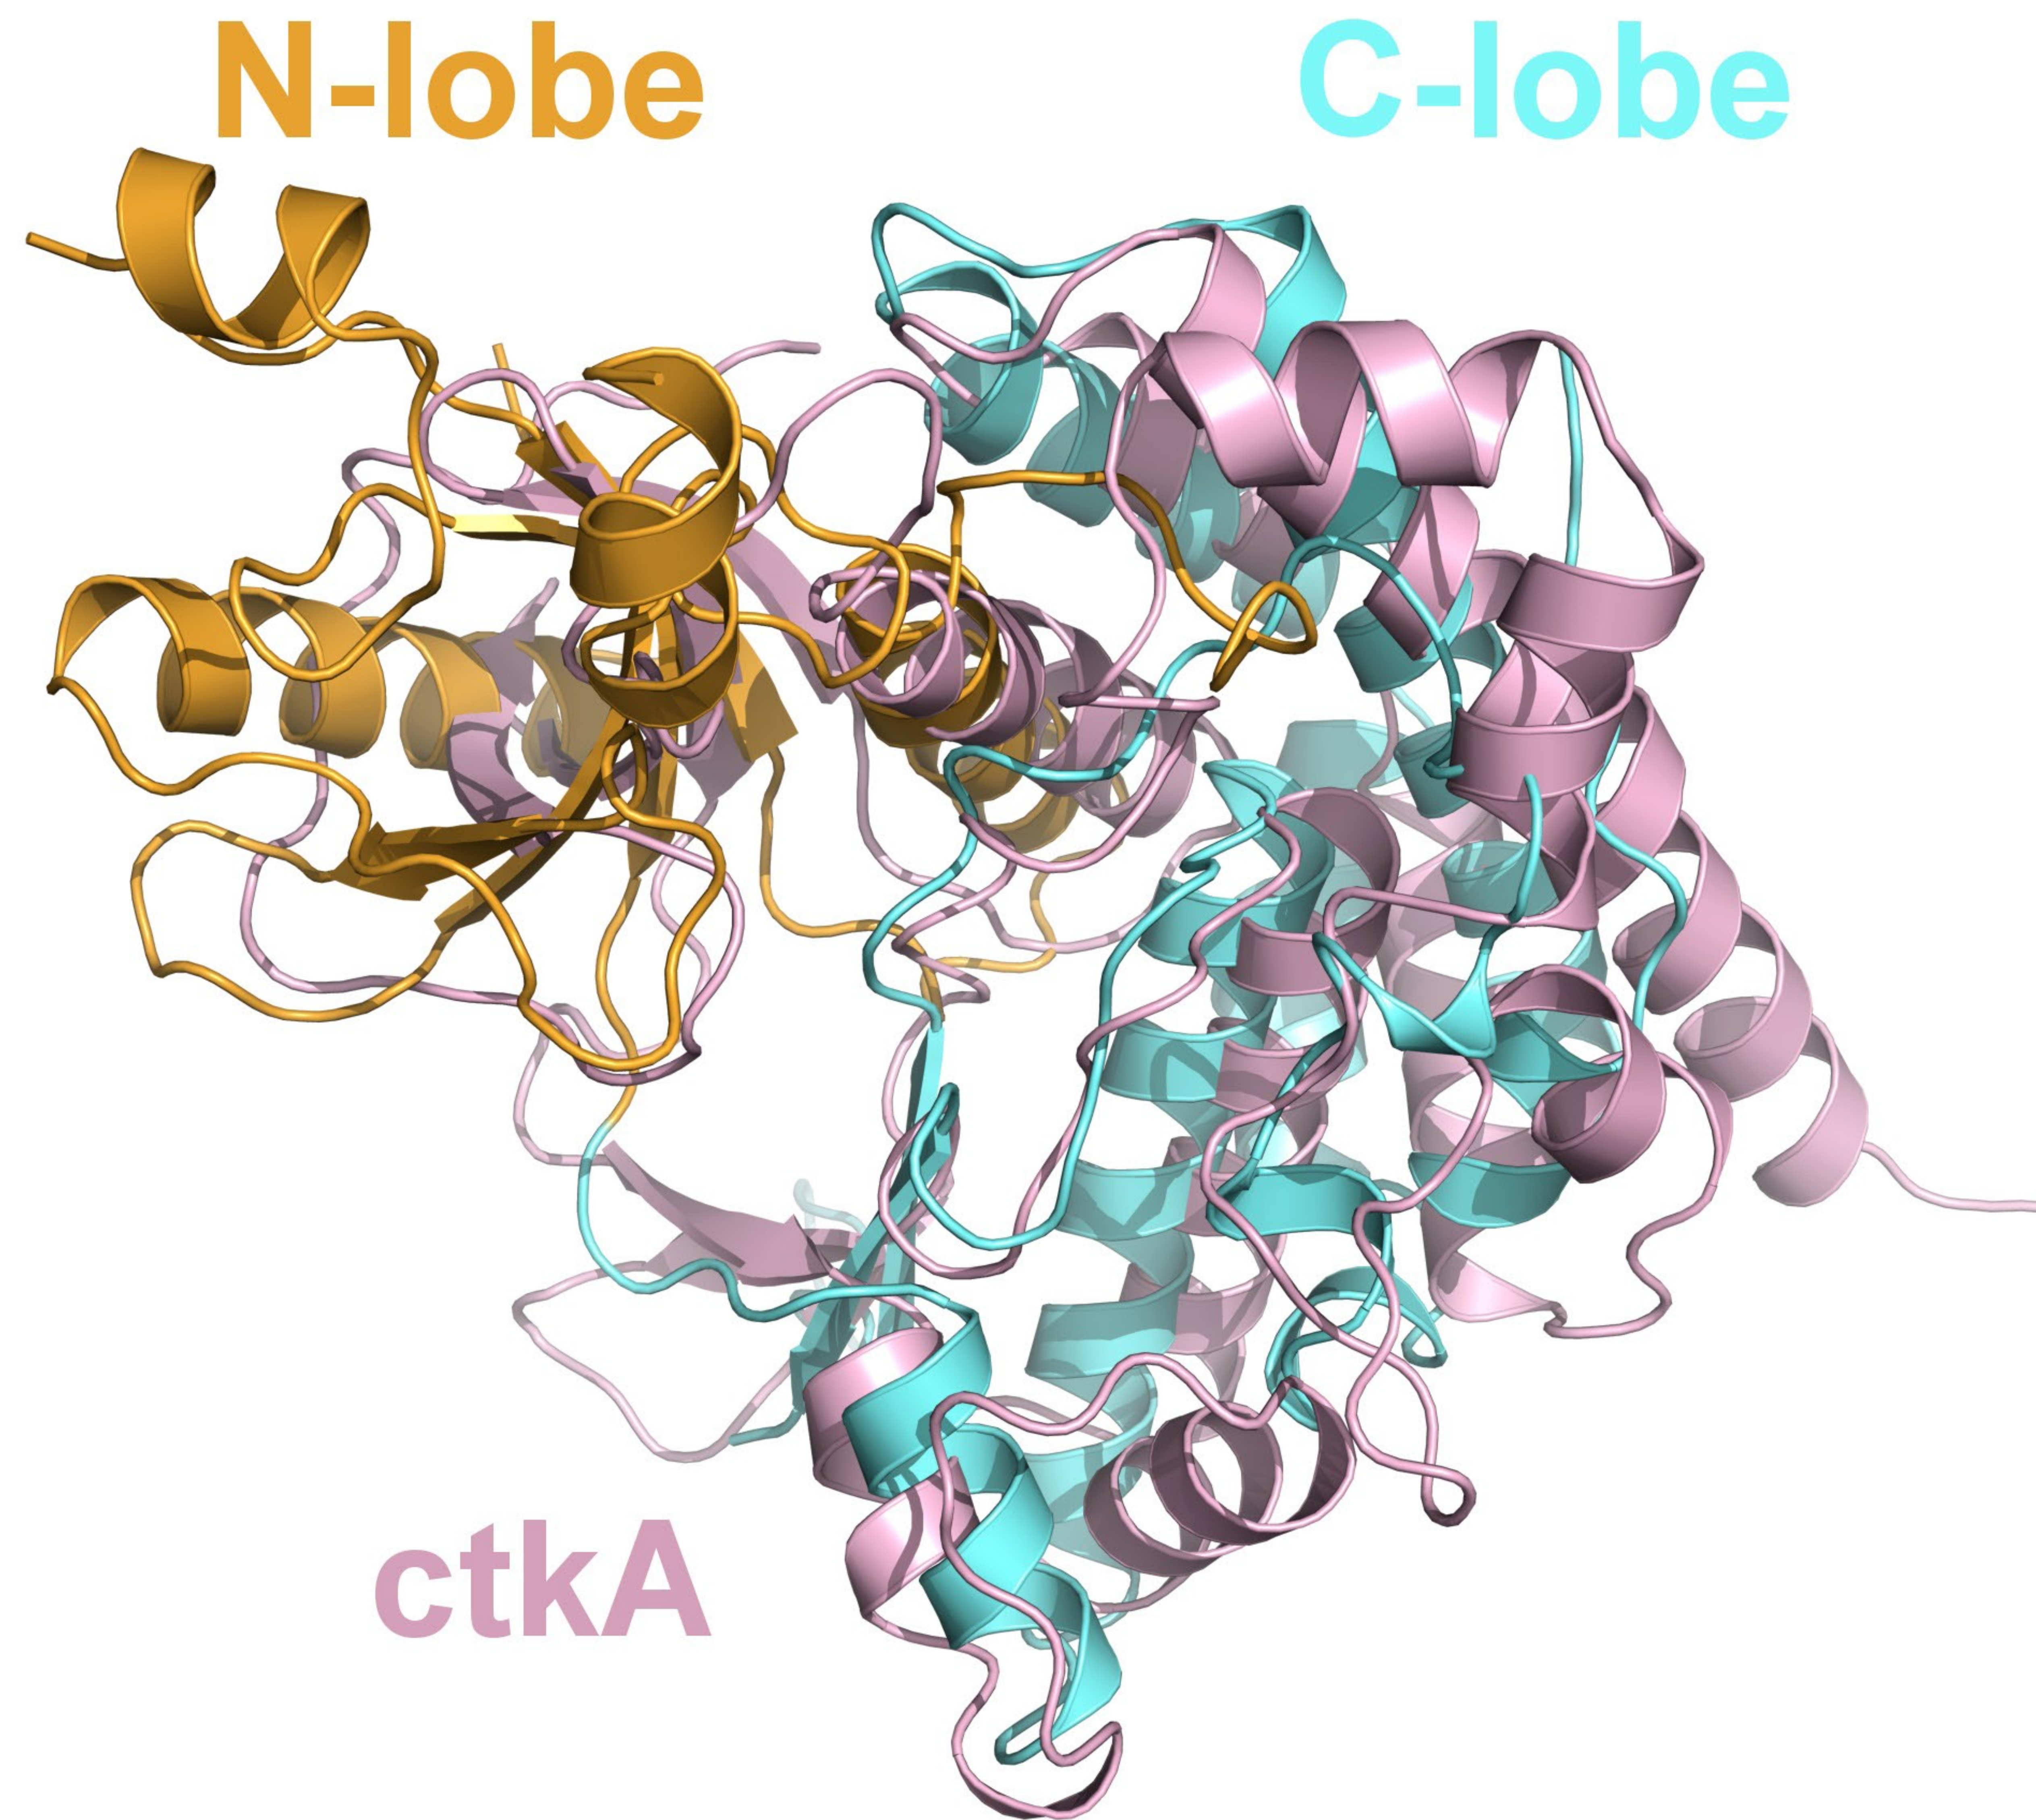

B

|             |            |     |                                                                                            |     |
|-------------|------------|-----|--------------------------------------------------------------------------------------------|-----|
| PI4KIIalpha | H.sapiens  | 101 | RNEFPEDPEFEAVVRQAEIAIERCIFPERIYQSSGSYFVKDPQGRRIAIFKPNNEEPYGHLNPKWTKWLQKLCCPCCFGRDCLVLNQGY  | 190 |
| PI4KIIbeta  | H.sapiens  | 97  | MNAFLDDPEFADIMLRAEQAIIEVGIFPERISQSSGSYFVKDPKRKIIGVFKPNSEEPYQQLNPKWTKYVHKVCCPCCFGRGCLIPNQGY | 186 |
| PI4KIIalpha | M.musculus | 101 | RNDFPEDPEFEVVRQAEVAIECSIYPERIYQSSGSYFVKDSQGRIVAIFKPNNEEPYGHLNPKWTKWLQKLCCPCCFGRDCLVLNQGY   | 190 |
| PI4KIIalpha | D.rerio    | 69  | RNEFPEDPEFREIIRKAERAIEEGIYPERIYQSSGSYFVKDSAGKIIGVFKPNNEEPYQQLNPKWTKWLQKLCCPCCFGRDCLVLNQGY  | 158 |

  

|             |            |     |                                                                                           |     |
|-------------|------------|-----|-------------------------------------------------------------------------------------------|-----|
| PI4KIIalpha | H.sapiens  | 191 | LSEAGASLVDQKLELNIVPRTKVVLASETFNYSVIDRVKSRGKRLALEKVPKVGQRFNRIGLPPKVGSGFQLVEGYKDADYWLRRFEAE | 280 |
| PI4KIIbeta  | H.sapiens  | 187 | LSEAGAYLVDNKLHLSIVPKTKVVLVSETFNYNVIDRAKSRGKKYALEKVPKVGKRFNRIGLPPKIGSGFQLVEGYKEAEYWLRRFEAD | 276 |
| PI4KIIalpha | M.musculus | 191 | LSEAGASLVDQKLELNIVPRTKVVLASETFNYSVIDRVKSRGKRLALEKVPKVGQRFNRIGLPPKVGSGFQLVEGYKDADYWLRRFEAE | 280 |
| PI4KIIalpha | D.rerio    | 159 | LSEAGASLVDQKLELNIVPRTKVVLASETFNYSVIDRVKSRGKRLALEKVPKVGQRFNRIGLPPKVGSGFQLVEGYKDADFWLRRFEAE | 248 |

  

|             |            |     |                                                                                         |     |
|-------------|------------|-----|-----------------------------------------------------------------------------------------|-----|
| PI4KIIalpha | H.sapiens  | 281 | PLPENTNRQLLLQFERLVLDYIIRNTIRGNDNWLIKDYDCP--MDSSSRDTDWVVVKEPVIKVAAIDNGLAFPLKHPDSIRAYFYWA | 368 |
| PI4KIIbeta  | H.sapiens  | 277 | PLPENIRKQFQSQFERLVILDYIIRNTIRGNDNWLVRYEKQKCEKIDHKEKWKIDDEEFLIKIAADNGLAFPFKHPDEIRAYFHWAA | 366 |
| PI4KIIalpha | M.musculus | 281 | PLPENTNRQLLLQFERLVLDYIIRNTIRGNDNWLIKDYDCP--MDNSSCRDTDWVMVREPVIKVAADNGLAFPLKHPDSIRAYFYWA | 368 |
| PI4KIIalpha | D.rerio    | 249 | PLPENTNRQLQFERLVLDYIIRNTIRGNDNWLIKDYDP--MDTSSNRDSDWLVVKDPDIKLAADNGLAFPLKHPDSIRAYFYWA    | 336 |

  

|             |            |     |                                                                                           |     |
|-------------|------------|-----|-------------------------------------------------------------------------------------------|-----|
| PI4KIIalpha | H.sapiens  | 369 | LPQAKVPFSQEIKDILPKISDPNFVKDLEEDLYELFKKDPGFGDRGQFHKQIAVMRGQILNLTQALKDNKSPLHLVQMPPIVIVETA   | 454 |
| PI4KIIbeta  | H.sapiens  | 367 | LPQAKVPFSQEIIRNLILPYISDMNFVQDLCEDLYELFKTDKGFDAKFESQMSVMRGQILNLTQALRDGKSPFQLVQIPCVIVERS    | 452 |
| PI4KIIalpha | M.musculus | 369 | LPQAKVPFSQEIKDILPKISDPNFVKDLEEDLYELFKKDPGFGDRGQFHKQIAVMRGQILNLTQALKDNKSPLHLVQMPPIVIVETA   | 454 |
| PI4KIIalpha | D.rerio    | 337 | LPQAKVPFSQEIIRDLVLPKLADPNFIKDLEEDLYELFKKDPGFGDRGQFHKQVSVMRGQILNLSQAMRDGKTPLQLVQMPPIVIVETA | 422 |

C

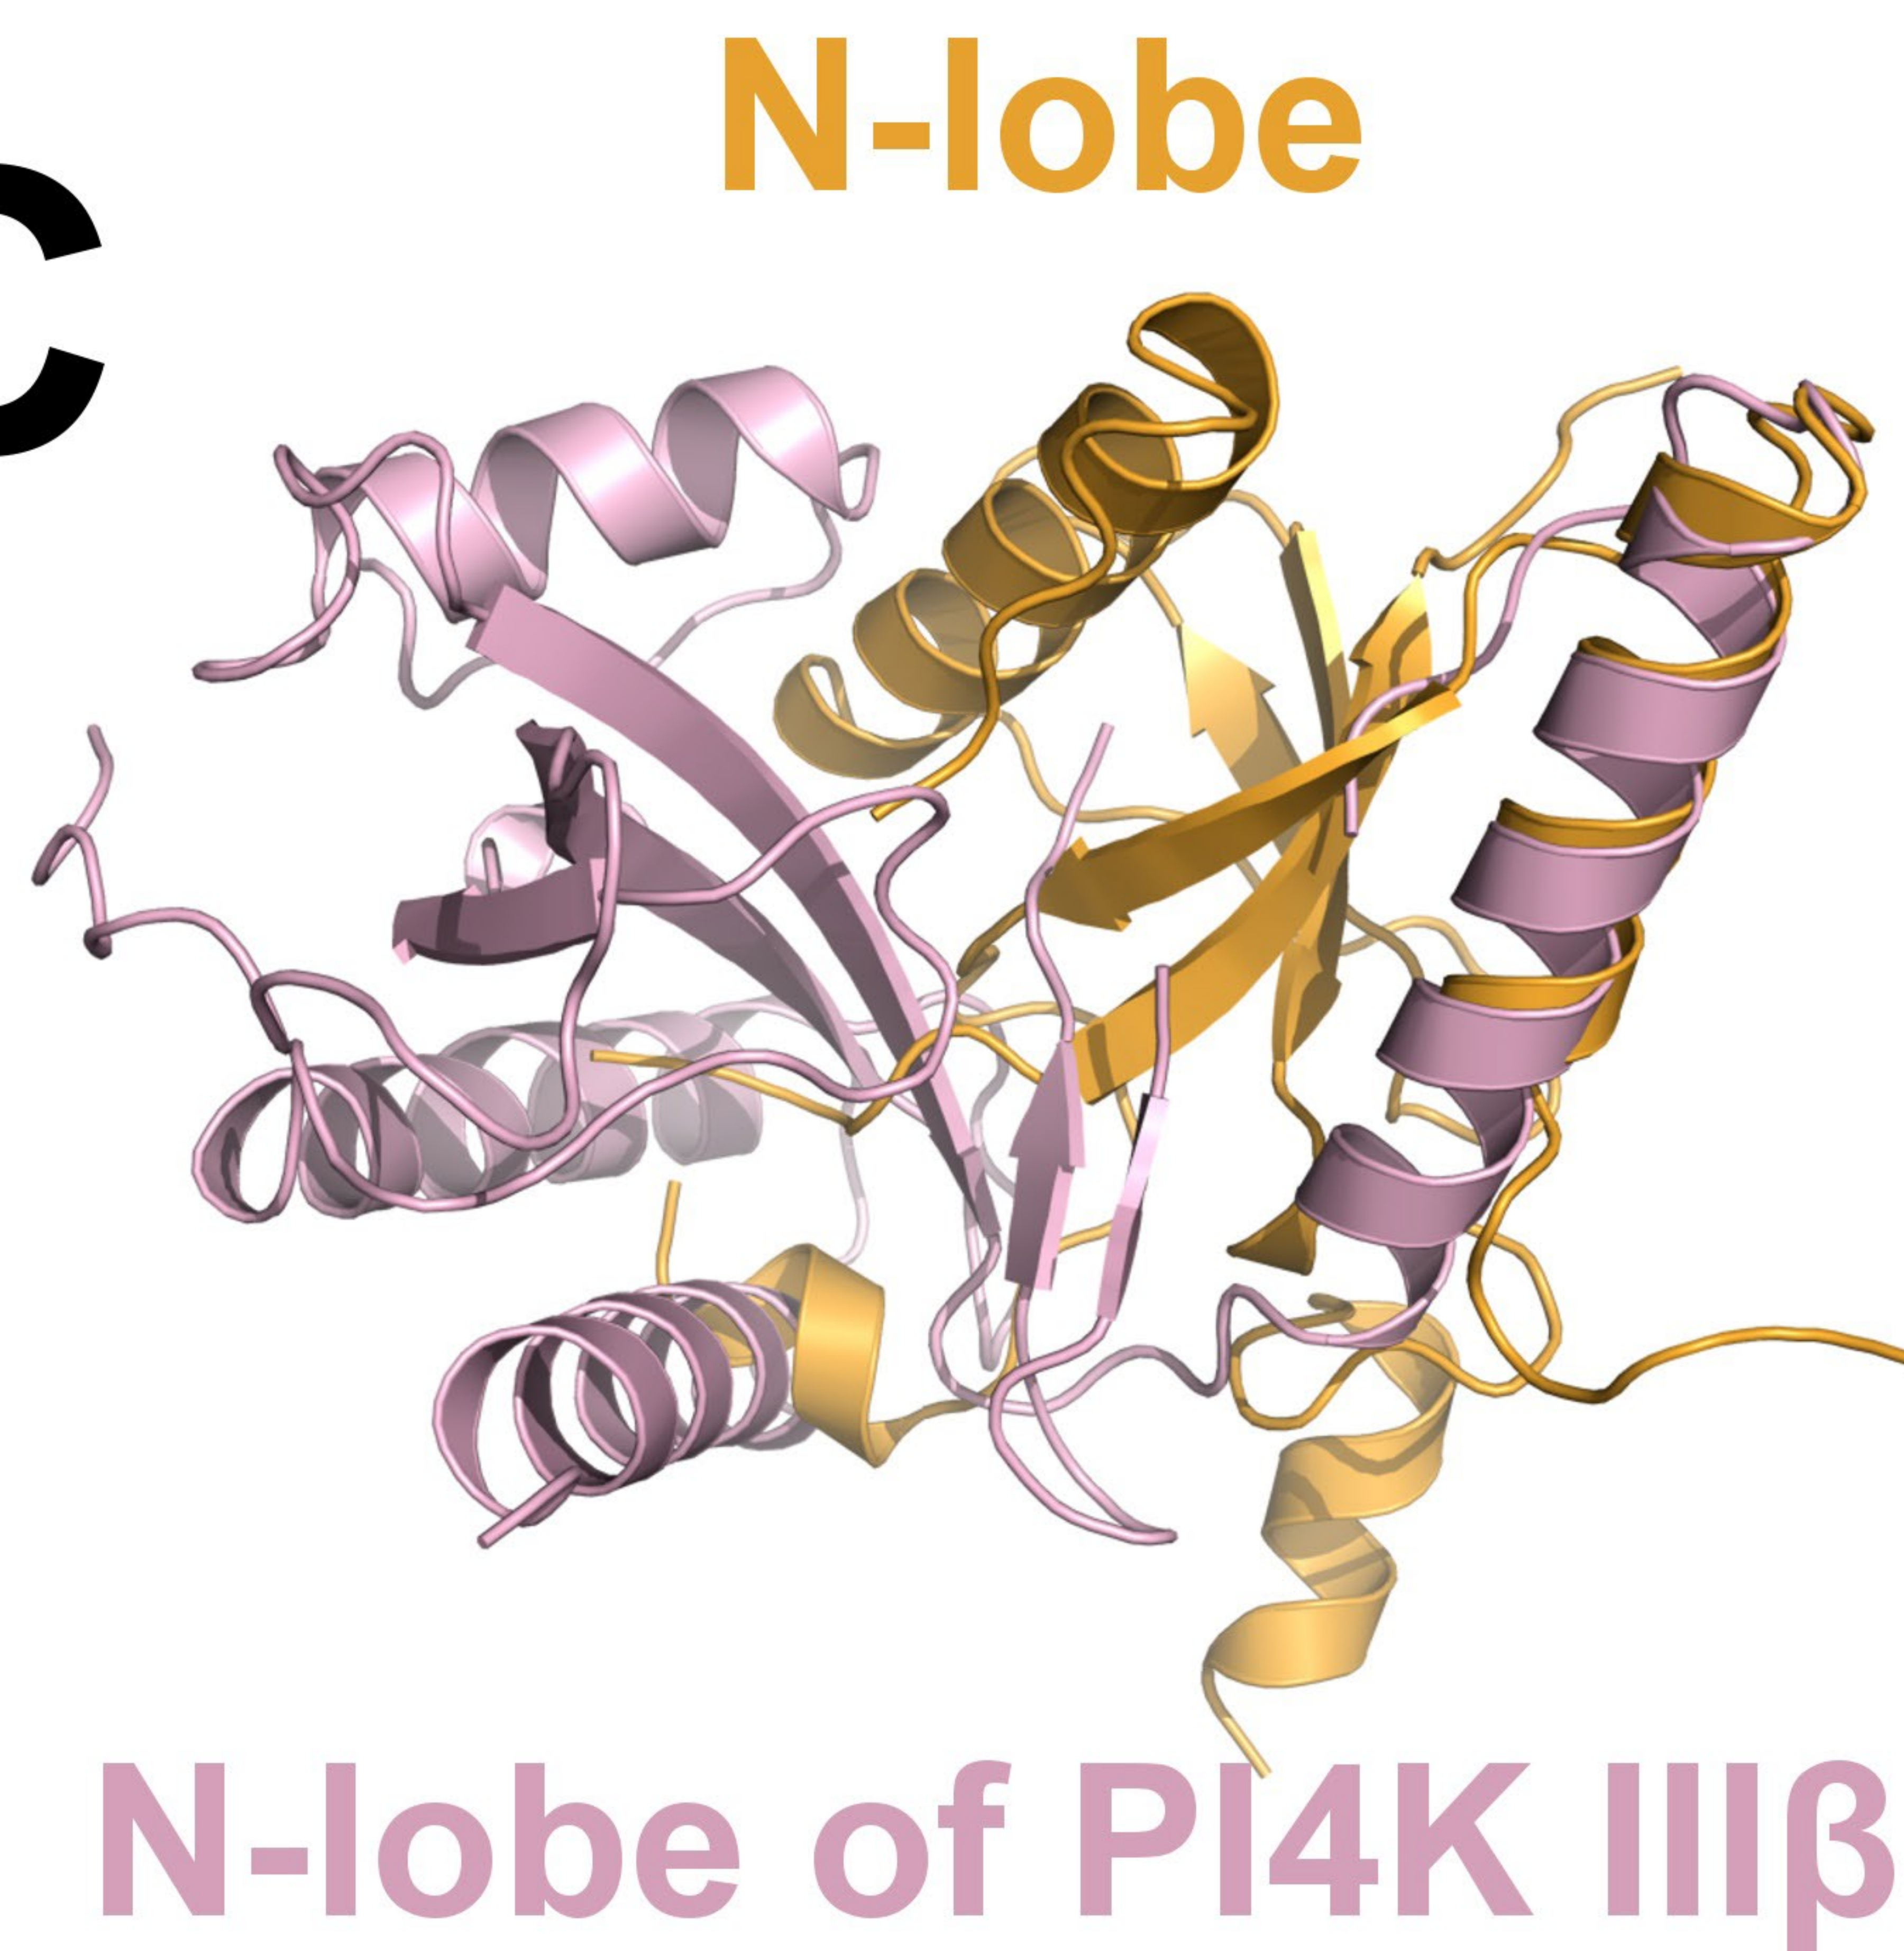

D

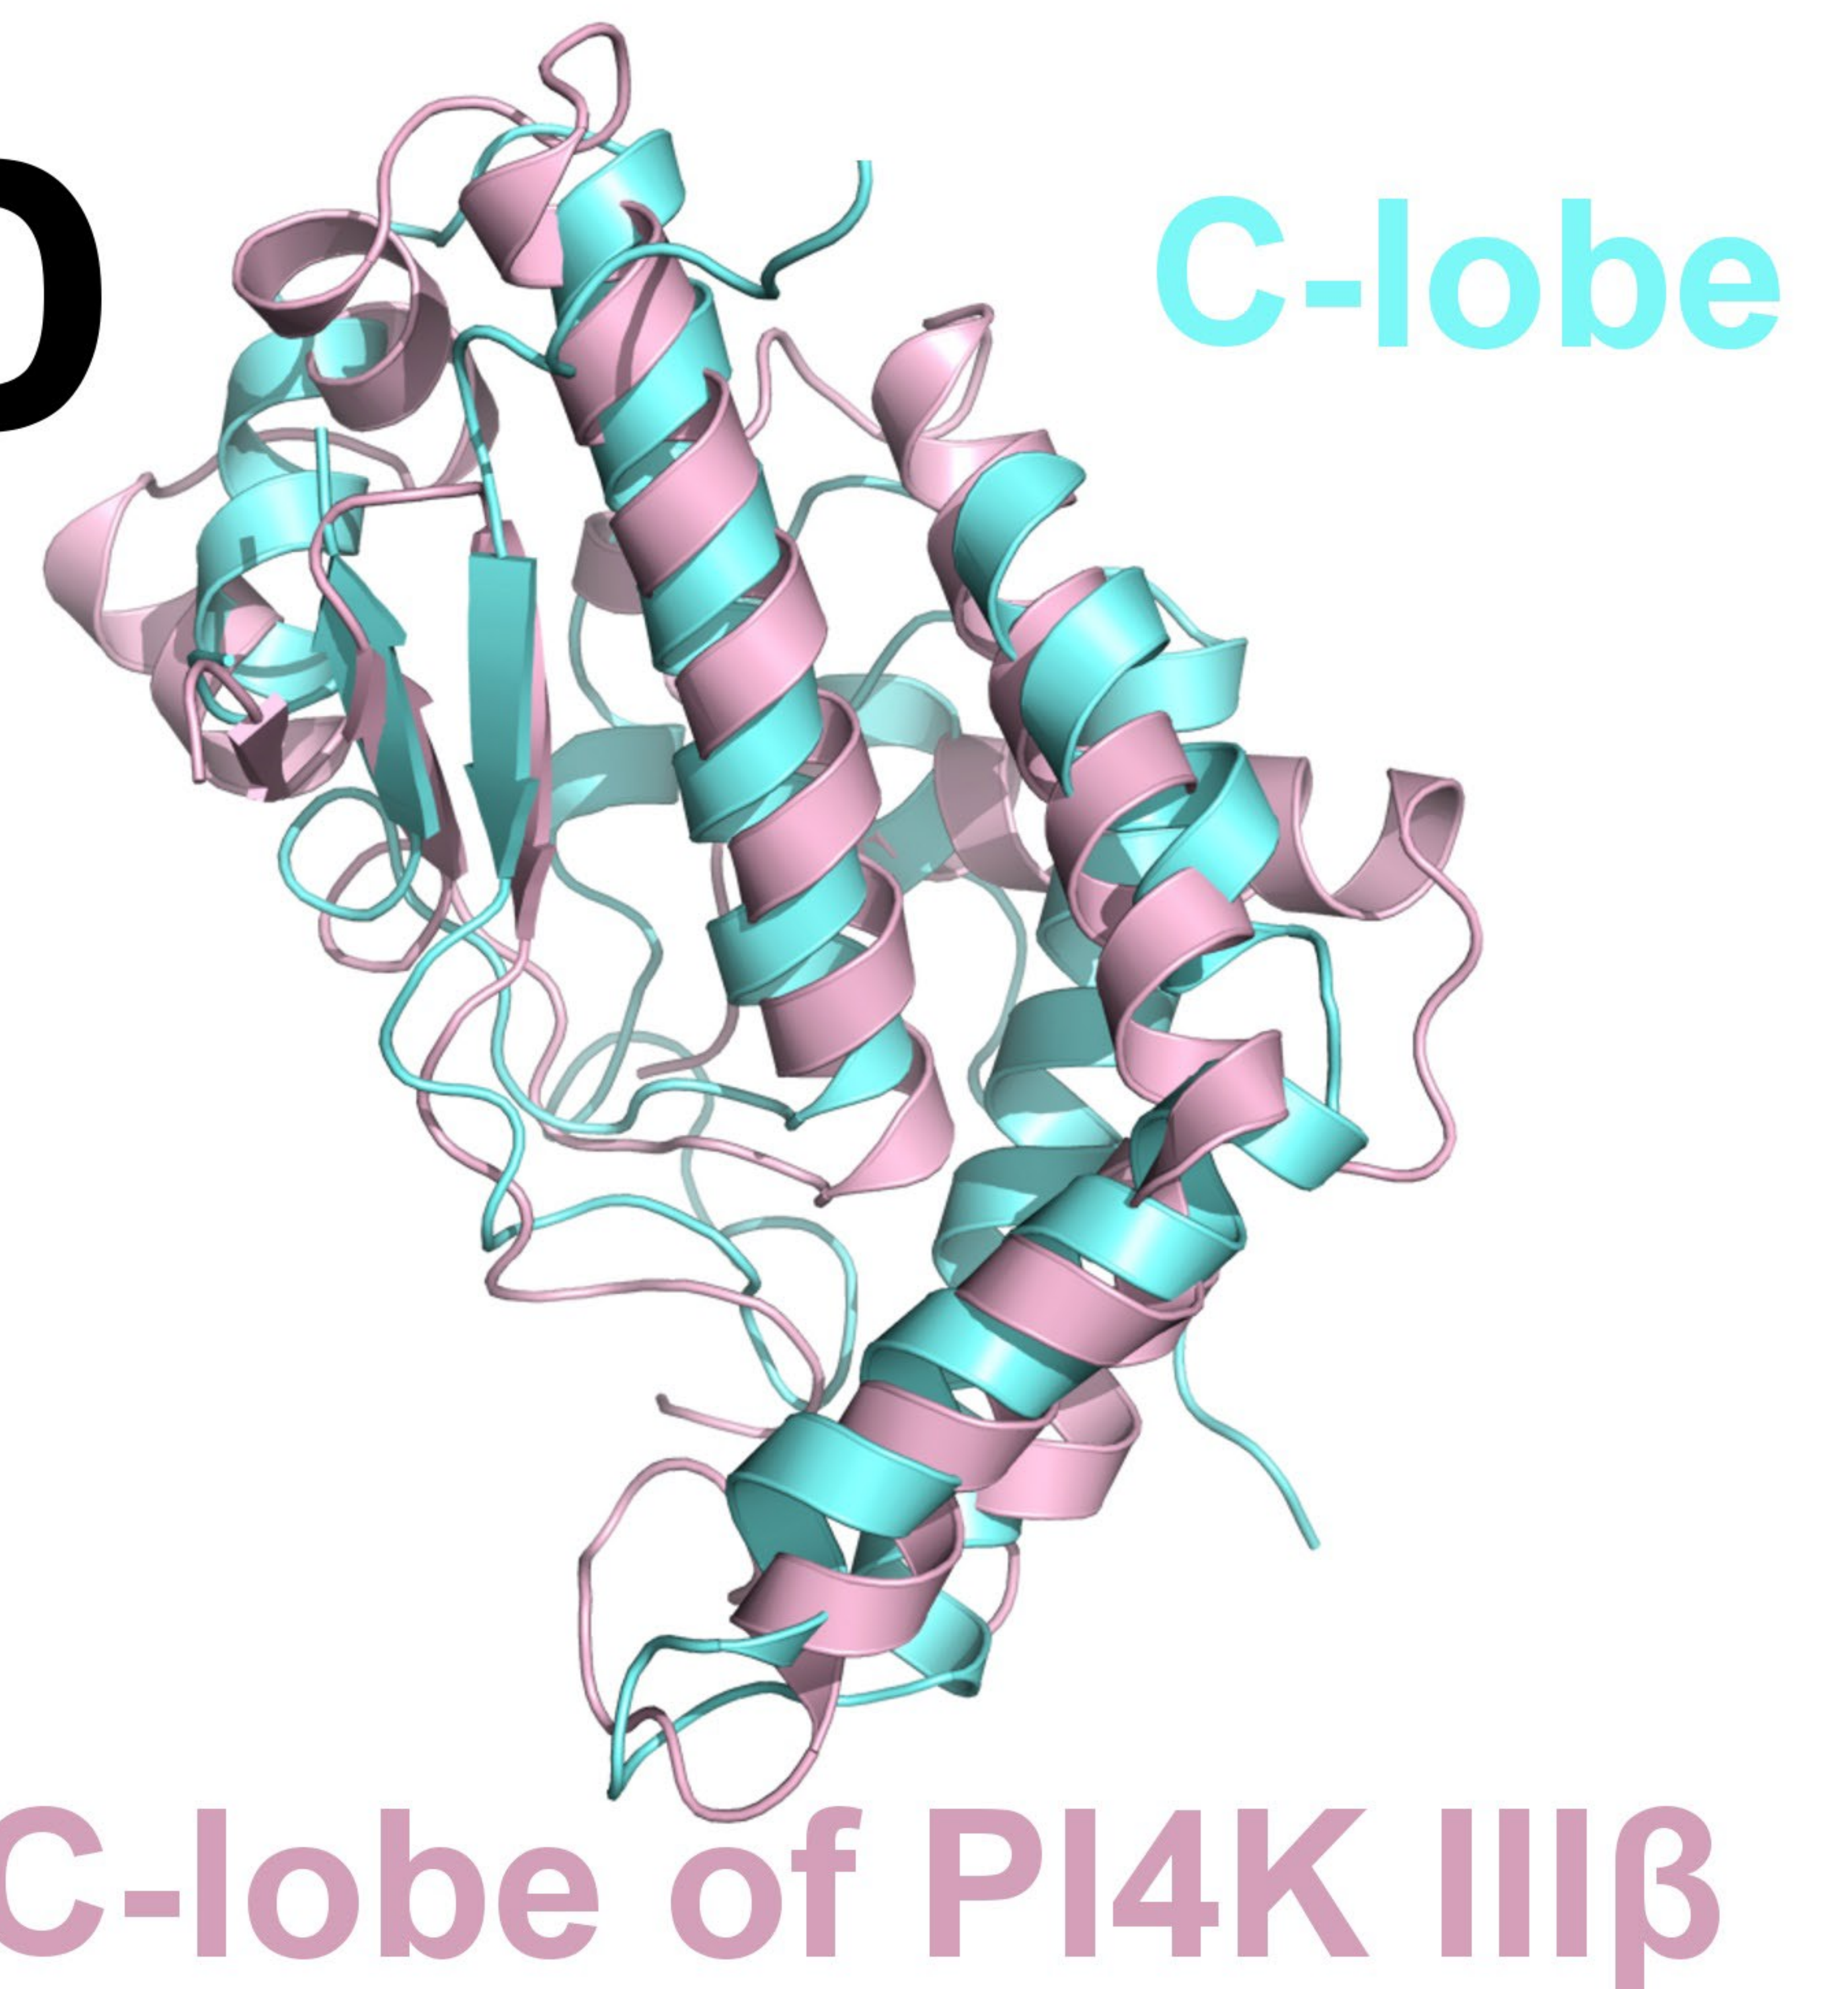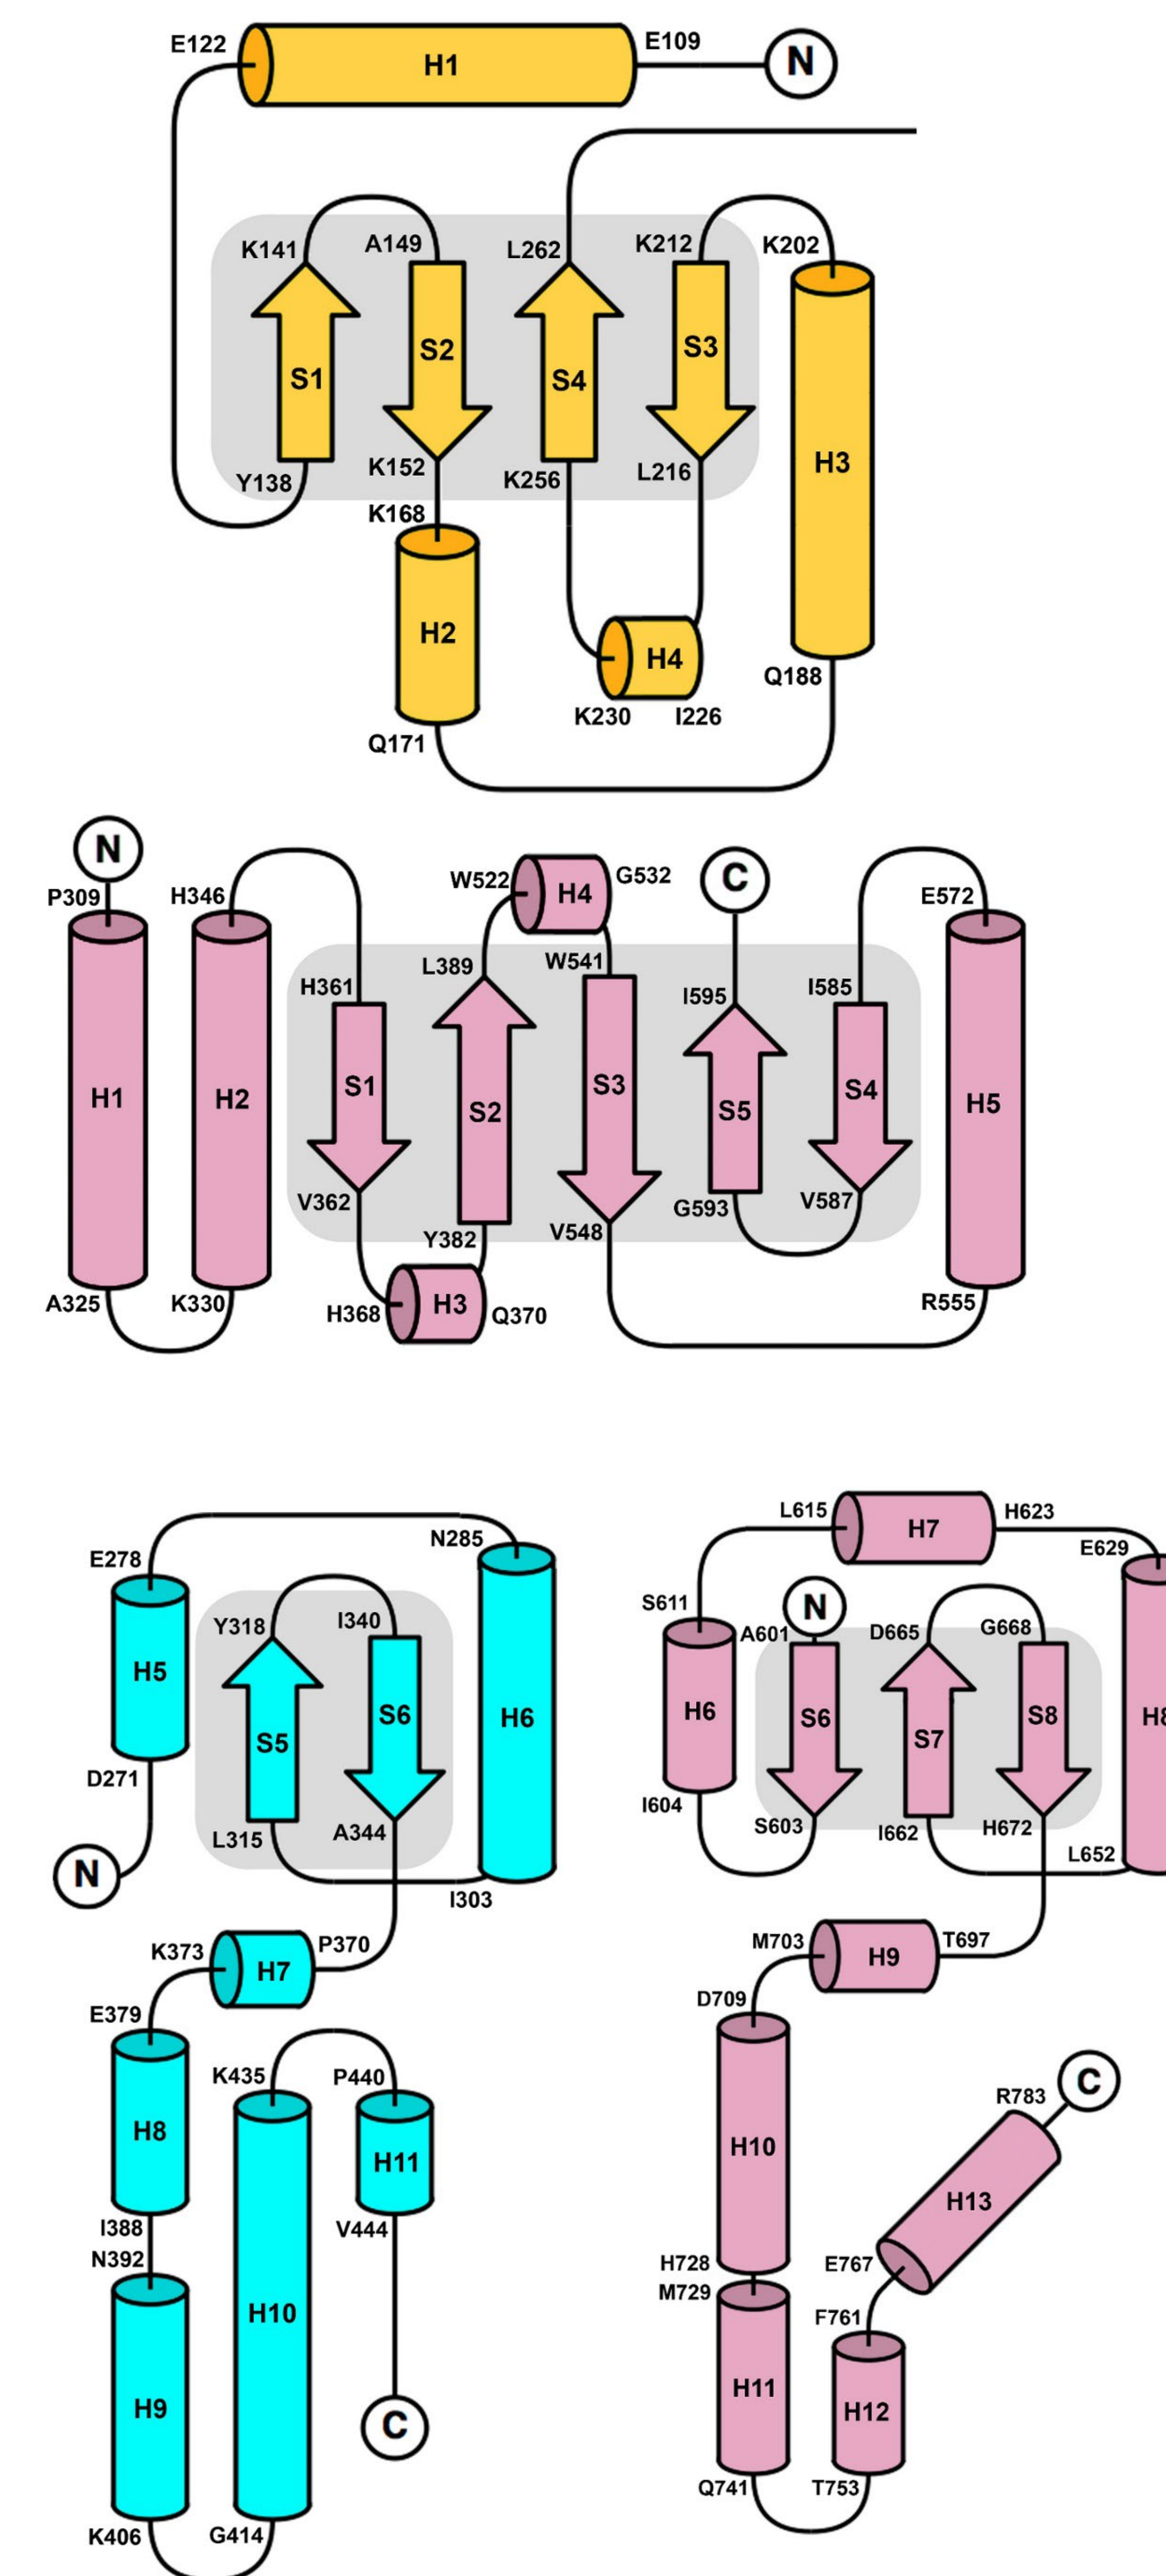

Supplement: embr0015-1085-sd1.pdf [file embr0015-1085-sd1.pdf]
