# Supplementary material
Source: PubMed Central journal article supplement (PMC4253849)

PI4KII $\alpha$ -mRFP

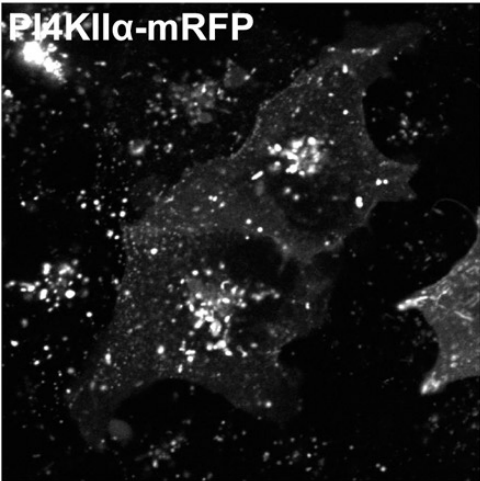

PI4KII $\alpha$ -mRFP 4Cys

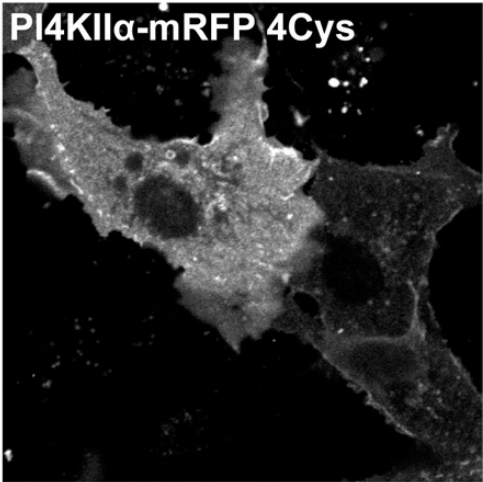

PI4KII $\alpha$ -mRFP SE loop

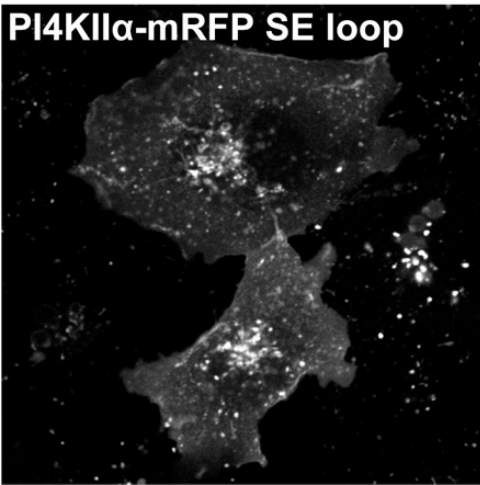

PI4KII $\alpha$ -mRFP W<sup>359</sup>A W<sup>368</sup>A

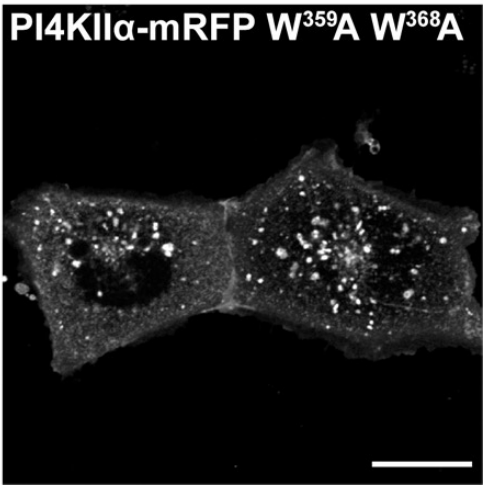

Supplement: embr0015-1085-sd4.pdf [file embr0015-1085-sd4.pdf]
