# Supplementary material
Source: PubMed Central journal article supplement (PMC4253849)

**A**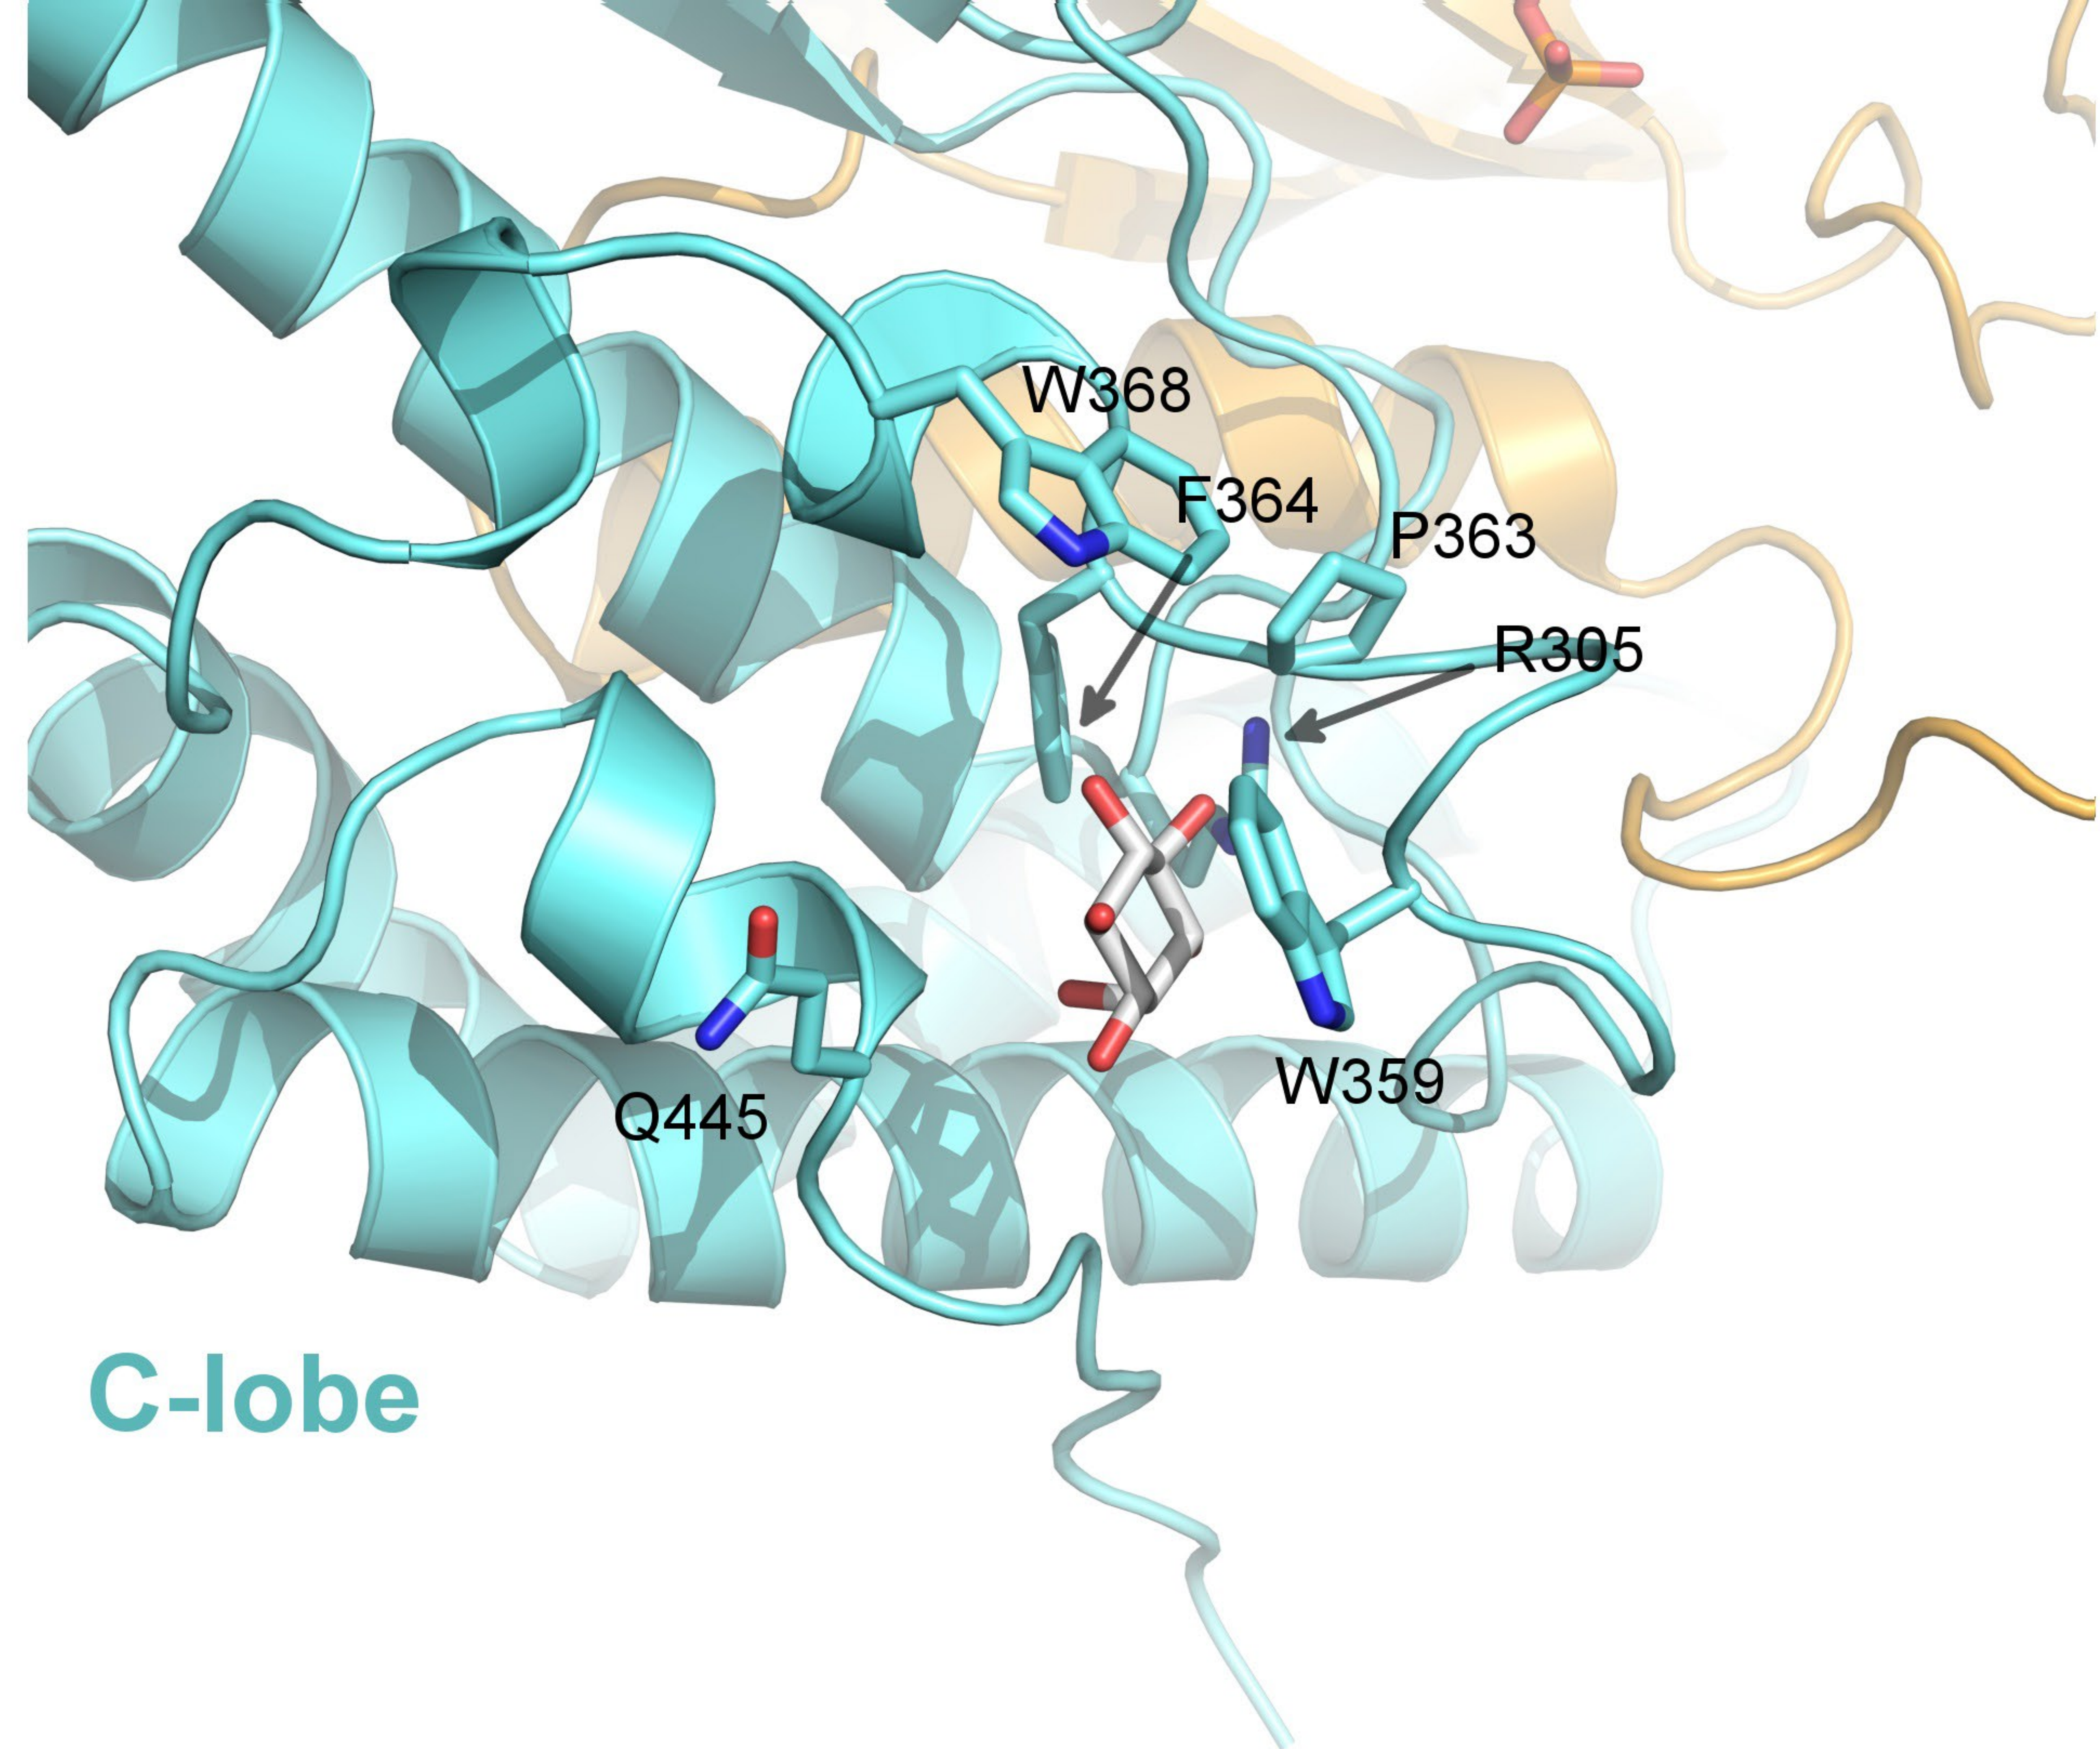**B**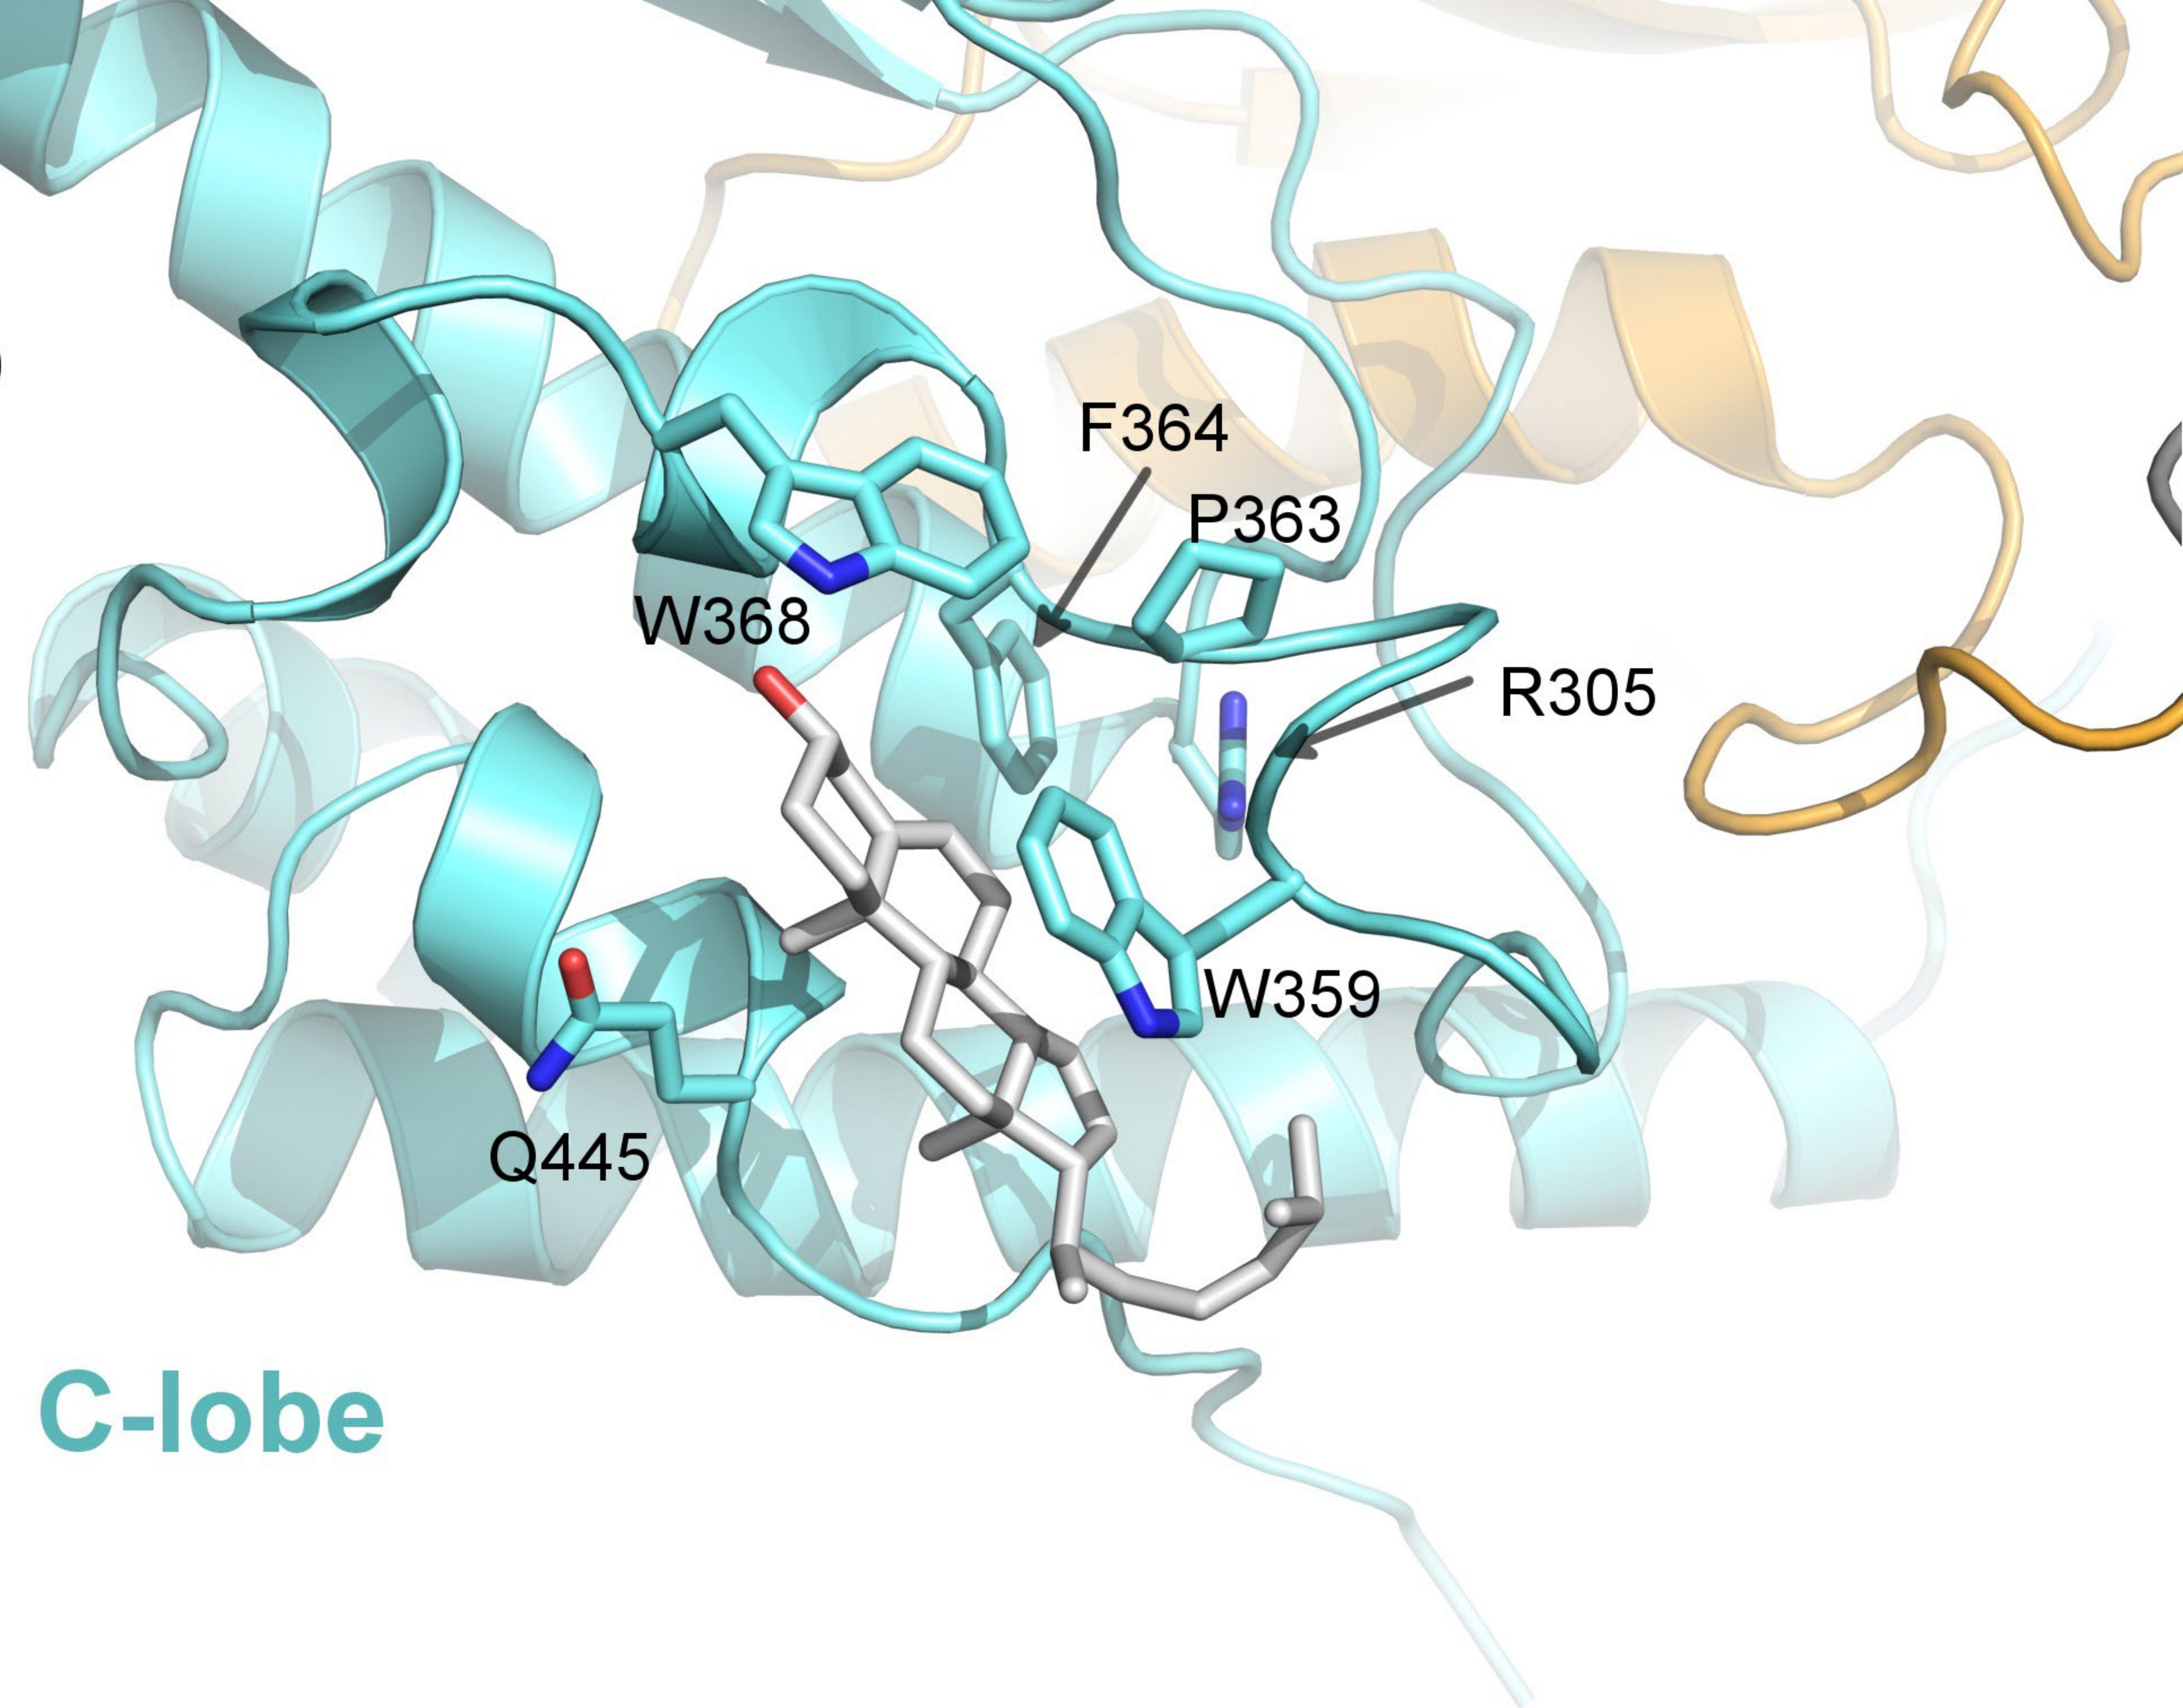

Supplement: embr0015-1085-sd2.pdf [file embr0015-1085-sd2.pdf]

**A**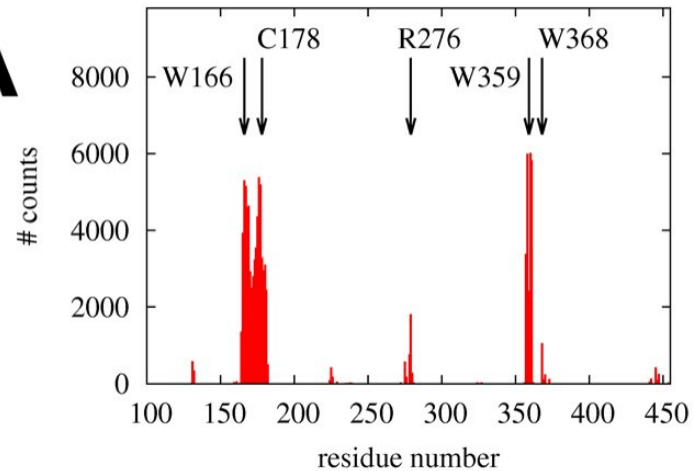**B**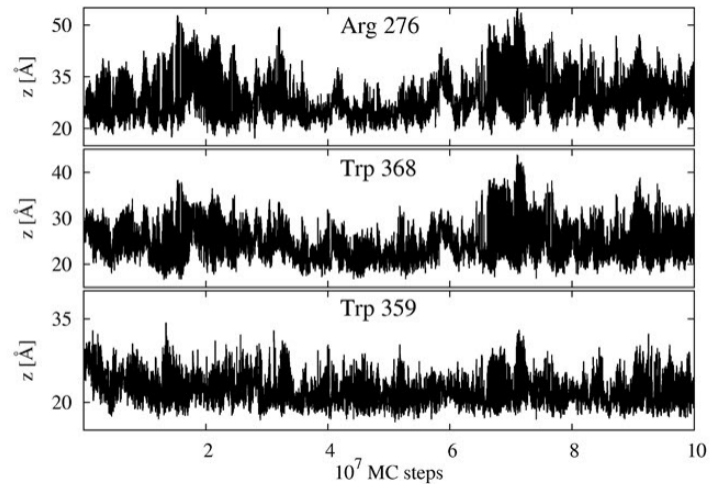**C**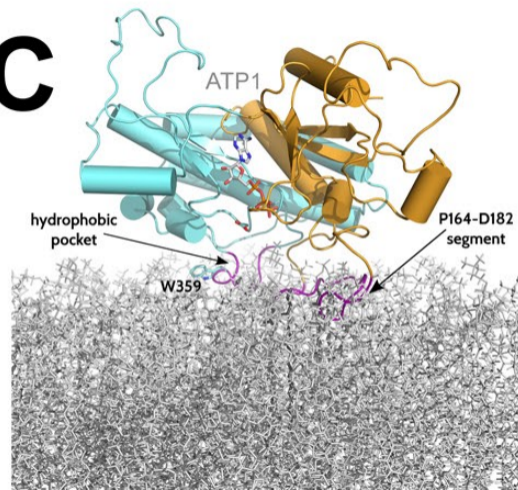

Supplement: embr0015-1085-sd3.pdf [file embr0015-1085-sd3.pdf]
